# Supplementary material
Source: PubMed Central journal article supplement (PMC3416070)
Supplement: CVI.00166-12_zcd999094506so1.pdf [file CVI.00166-12_zcd999094506so1.pdf]

Table S1<sup>1</sup>

| <b>CFP-10</b>  |                        |                        |                         |
|----------------|------------------------|------------------------|-------------------------|
| <b>CUT-OFF</b> | <b>SENSITIVITY (%)</b> | <b>SPECIFICITY (%)</b> | <b>LIKELIHOOD RATIO</b> |
| <b>pg/ml</b>   |                        |                        |                         |
| 85             | 100                    | 41                     | 1.7                     |
| <b>188</b>     | <b>100</b>             | <b>59</b>              | <b>2.4</b>              |
| 450            | 79                     | 88                     | 6.7                     |

---

<sup>1</sup> ROC curve analysis at varying cut-off values for CFP-10 response
