# Supplementary material
Source: PubMed Central journal article supplement (PMC3416070)
Supplement: CVI.00166-12_zcd999094506so2.pdf [file CVI.00166-12_zcd999094506so2.pdf]

Table S2<sup>1</sup>

| <b>ESAT-6<br/>CUT-OFF<br/>pg/ml</b> | <b>SENSITIVITY(%)</b> | <b>SPECIFICITY(%)</b> | <b>LIKELIHOOD RATIO</b> |
|-------------------------------------|-----------------------|-----------------------|-------------------------|
| 181                                 | 100                   | 24                    | 1.3                     |
| <b>471</b>                          | <b>100</b>            | <b>47</b>             | <b>1.9</b>              |
| 912                                 | 93                    | 59                    | 2.3                     |

<sup>1</sup> ROC curve analysis at varying cut-off values for ESAT-6 response
