# Supplementary material
Source: PubMed Central journal article supplement (PMC3416070)
Supplement: CVI.00166-12_zcd999094506so3.pdf [file CVI.00166-12_zcd999094506so3.pdf]

Table S3<sup>1</sup>

| <b>SUMMED<br/>RESPONSE<br/>CUT-OFF<br/>pg/ml</b> | <b>SENSITIVITY(%)</b> | <b>SPECIFICITY(%)</b> | <b>LIKELIHOOD RATIO</b> |
|--------------------------------------------------|-----------------------|-----------------------|-------------------------|
| 292                                              | 100                   | 29                    | 2.4                     |
| <b>857</b>                                       | <b>100</b>            | <b>53</b>             | <b>2.1</b>              |
| 2330                                             | 86                    | 71                    | 2.9                     |

---

<sup>1</sup> ROC curve analysis at varying cut-off values for summed antigen response
