# Supplementary material
Source: PubMed Central journal article supplement (PMC3416070)
Supplement: CVI.00166-12_zcd999094506so4.pdf [file CVI.00166-12_zcd999094506so4.pdf]

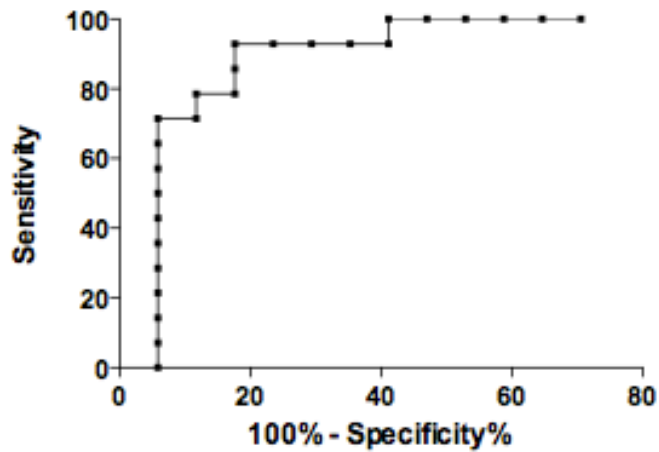

CFP-10 response

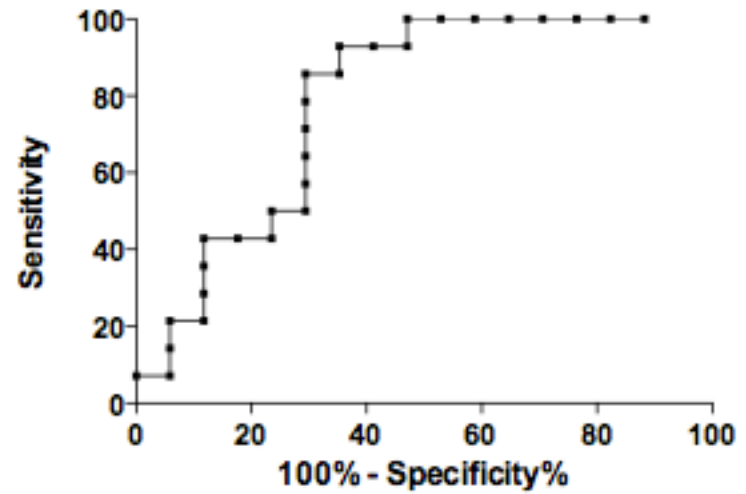

ESAT-6 response

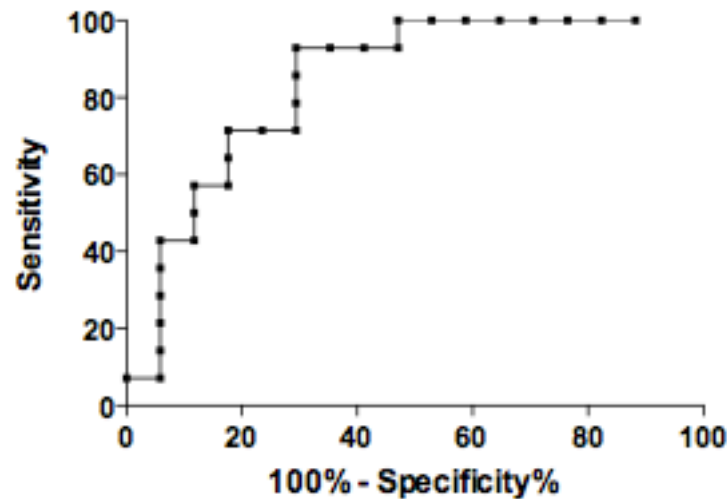

Summed antigen response

Figure S1: ROC curves for CFP-10, ESAT-6 and summed antigen response. Participants with a negative QuantiFERON Gold-in-tube(QFT-GIT) result were classified as controls and QFT-GIT positive participants as latent TB infected.
